# Supplementary material for: How to Reduce the No-Show Rate in the Psychiatric Oncology Clinic: Clinical Safety and Effectiveness Project
Source: Atypon-hosted journal article supplement (doi:10.1176/appi.ps.201900480), 2021-01-20
Supplement: ps_201900480_ds1.pdf [file ps_201900480_ds1.pdf]

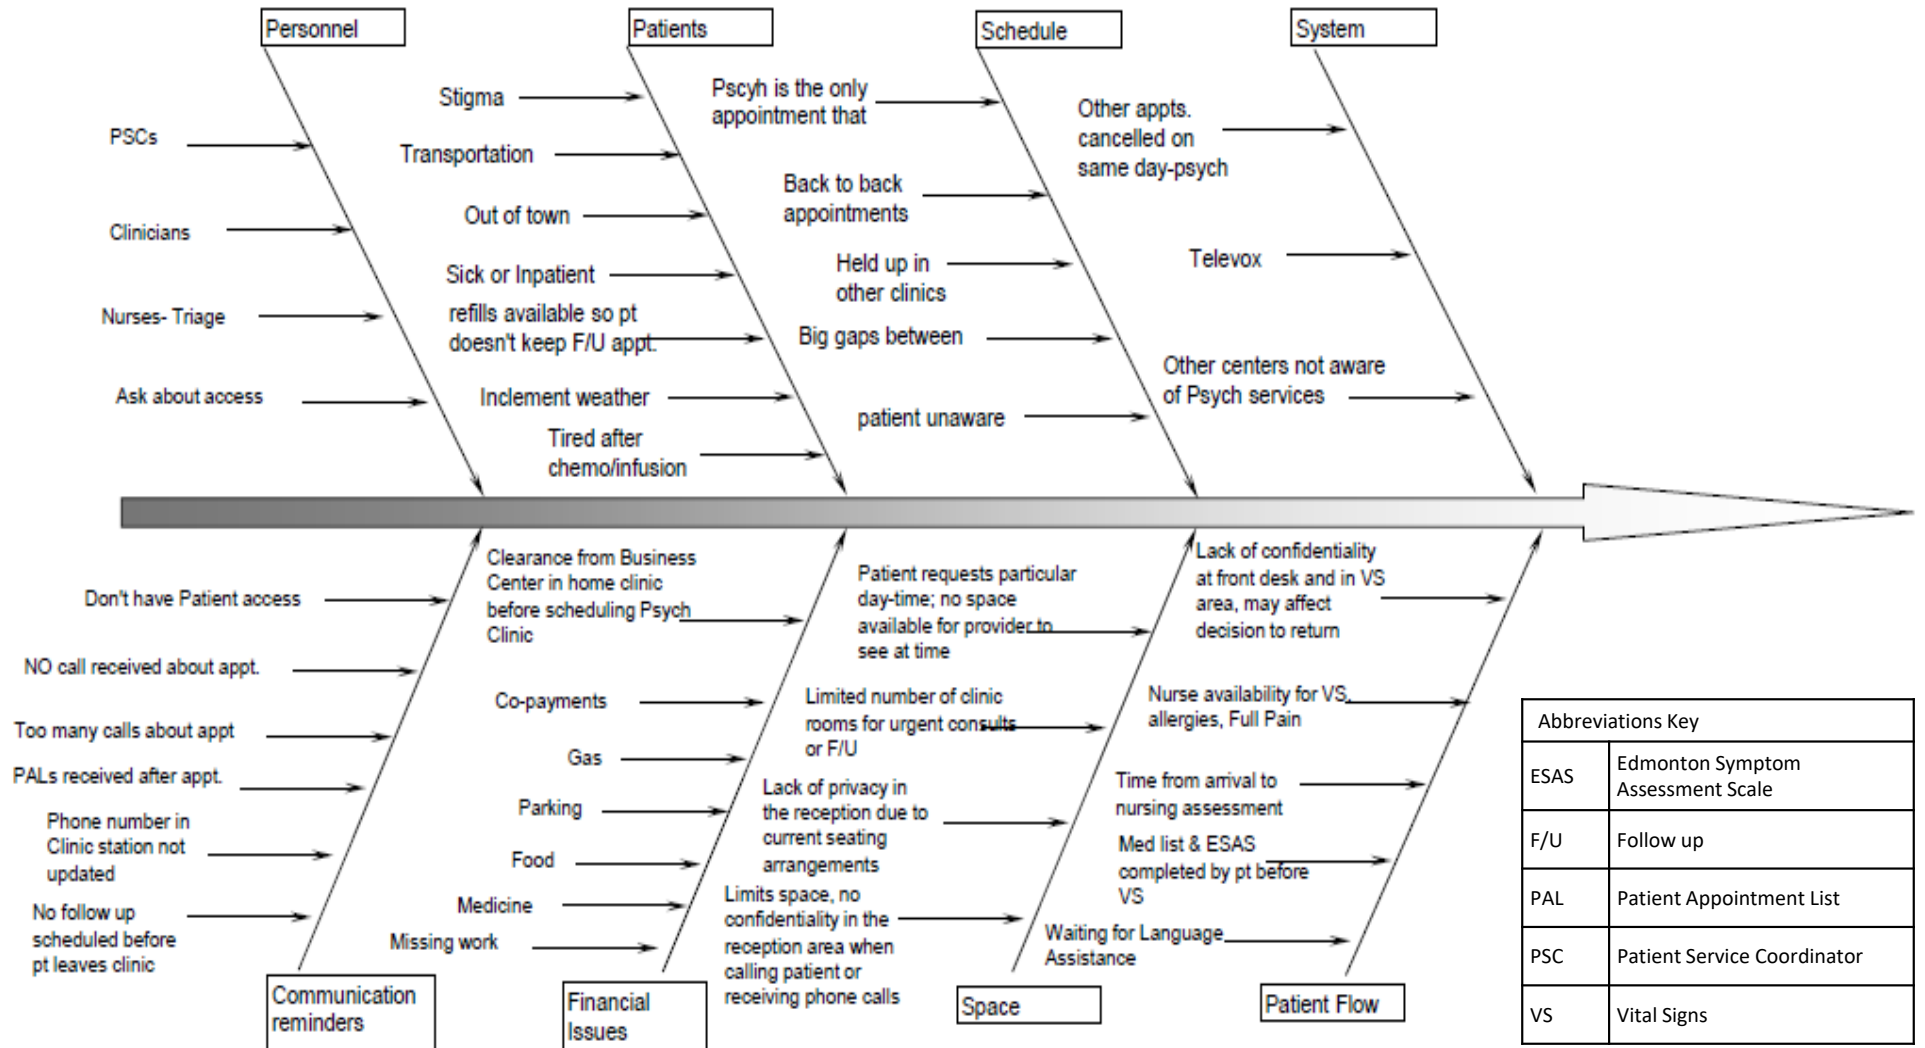

| Abbreviations Key |                                   |
|-------------------|-----------------------------------|
| ESAS              | Edmonton Symptom Assessment Scale |
| F/U               | Follow up                         |
| PAL               | Patient Appointment List          |
| PSC               | Patient Service Coordinator       |
| VS                | Vital Signs                       |
